# Supplementary material for: An Example of Personalized Treatment in HR+ HER2+ Long Survivor Breast Cancer Patient (Case Report)
Source: MDPI journal article supplement (doi:10.3390/curroncol28030184), 2021-05-25
Supplement: s1 [file s1]

## Supplementary Materials:

### An Example of Personalized Treatment in HR+ HER2+ Long Survivor Breast Cancer Patient (Case Report)

Martina Panebianco, Beatrice Taurelli Salimbeni, Michela Roberto and Paolo Marchetti

Table S1. Panel of SNPs investigated.

| Gene             | Rs Code    | Polymorphism | Amino acid | Genotype                                                              | Functional effects |
|------------------|------------|--------------|------------|-----------------------------------------------------------------------|--------------------|
| TRANSPORTERS     |            |              |            |                                                                       |                    |
| ABCB1            | rs1128503  | C1236T       |            | C/T                                                                   | Decreased          |
|                  | rs1045642  | C3435T       |            | C/T                                                                   |                    |
|                  | rs4148738  | G>A          |            | T allele leads to lower activity<br>G/A G allele increased Dabigatran |                    |
| ABCC1/MRP1       | rs45511401 | G761V-G>T    |            | G/G normal activity                                                   | Normal activity    |
| ABCC2/MRP2       | rs8187710  |              | Cys1515Tyr | G/G normal activity                                                   | Normal activity    |
| ABCC2/MRP2       | rs17222723 | T > A        | Val1188Glu | T/T normal activity                                                   | Normal activity    |
| ABCC2-C-24T      | rs717620   |              |            | T/T<br>T allele leads to lower expression                             | Lower Expression-  |
| ABCG2            | rs2231142  | C421A        | Q141K      | C/C                                                                   |                    |
| SLC15A2          | rs2257212  | C > T        | L305F      | C/C                                                                   |                    |
| SLCO1B1          | rs4363657  | T521C        | V174A      | T/C                                                                   | Decreased activity |
|                  | rs4149056  | T>C          |            | T/C<br>C allele leads to lower activity of transporter                |                    |
| 5HTT-LPR         |            |              |            | S/L<br>S allele leads to lower gene trans-<br>cription                | Decreased activity |
| CYP              |            |              |            |                                                                       |                    |
| CYP1A2*1C        | rs2069514  | G3860A       |            | G/G normal activity                                                   | Normal activity    |
| CYP1A2*1F        | rs762551   | C163A        | Intron     | A/A A allele leads to increased induci-<br>bility                     | Increased          |
| CYP2C19          |            |              |            |                                                                       |                    |
| Normal activity  |            |              |            |                                                                       |                    |
| CYP2C19*17       | rs12248560 | C806T        | Upstream   | C/C                                                                   | Normal activity    |
| CYP2C19*10       | rs6413438  | C1953T       |            | C/C                                                                   |                    |
| CYP2C19*2        | rs4244285  | G19154A      |            | G/G                                                                   |                    |
| CYP2C19*3        | rs4986893  | G17948A      |            | G/G                                                                   |                    |
| CYP2C19*4        | rs28399504 | A1G          |            | A/A                                                                   |                    |
| CYP2C19*5        | rs56337013 | C90033T      |            | C/C                                                                   |                    |
| CYP2C19*7        | rs72558186 | T19294A      |            | T/T                                                                   |                    |
| CYP2C9*2         | rs1799853  | C430T        | Cys144Arg  | C/C                                                                   | Decreased          |
| CYP2C9*3         | rs1057910  | A1075C       | Ile359Leu  | A/C<br>C allele leads to lower activity                               |                    |
| CYP2D6           |            |              |            |                                                                       |                    |
| Poor metabolizer |            |              |            |                                                                       |                    |

|                                 |            |                         |                  |                                      |                            |
|---------------------------------|------------|-------------------------|------------------|--------------------------------------|----------------------------|
| CYP2D6*2                        | rs16947    | C2850T                  | Arg296Cys        | C/C                                  |                            |
| CYP2D6*10                       | rs1065852  | C100T                   | Pro34Ser         | T/T                                  |                            |
| CYP2D6*17                       | rs28371706 | C1023T                  | Thr107Ile        | C/C                                  |                            |
| CYP2D6*6                        | rs5030655  | 1707delT                | Trp152fs         | IN3/IN3                              |                            |
| CYP2D6*20                       | rs72549354 | insG                    | Leu213fs         | DEL/DEL                              |                            |
| CYP2D6*5                        | -          | Deletion                | Stop codon       | Absent                               |                            |
| CYP2D6*38                       | rs72549351 | delGACT                 | Thr272fs         | INS/INS                              |                            |
| CYP2D6*29                       | rs61736512 | G1659A                  | Val136Met        | G/G                                  |                            |
| CYP2D6*2A                       | rs1080985  | C1584G                  | Upstream         | C/C                                  |                            |
| CYP2D6*3                        | rs35742686 | 2549delA                | Arg259fs         | INS/INS                              |                            |
| CYP2D6*4                        | rs3892097  | G1846A                  | Acceptor         | A/A                                  |                            |
| CYP2D6*41                       | rs28371725 | G2988A                  | Intron           | G/G                                  |                            |
| CYP2D6*7                        | rs5030867  | A2935C                  | His324Pro        | A/A                                  |                            |
| CYP2D6*9                        | rs5030656  | 2615_2617delAAG         | Inframe del.     | INS/INS                              |                            |
| CYP3A4*1B                       | rs2740574  | A392G                   | Upstream         | A/A                                  | Normal activity            |
|                                 |            |                         |                  | C/C                                  |                            |
| CYP3A4*22                       | rs35599367 | C15389T                 | Intron           | G alleles lead to increased activity | Normal activity            |
| CYP3A5*3                        | rs776746   | A6986G                  | Acceptor         | G/G                                  | Normal activity            |
|                                 |            |                         |                  | T/T                                  |                            |
| CYP1A1                          | rs1048943  | T>C                     | Ile462Val        | C allele leads to increased activity | Normal activity            |
| CYP2B6                          | rs2279343  | A785G                   | Lys262Arg        | A/G                                  | Decreased (lower activity) |
|                                 | rs3745274  | G516T                   | Gln172His        | G/T                                  |                            |
|                                 | rs3211371  | C1459T                  | Arg487Cys        | C/T                                  |                            |
|                                 | rs2279343  | A785G                   | Lys262Arg        | A/G                                  |                            |
| CYP2B6                          | rs28399499 | T983C                   | Ile328Thr        | T/T                                  | Normal activity            |
| CYP2A6                          | rs28399433 | A48C                    |                  | A/A                                  | Normal activity            |
|                                 | rs1801272  | T>A                     |                  | T/T                                  |                            |
| CYP2C8*2                        | rs11572103 | A805T                   | Ile269Phe        | A/A                                  | Normal activity            |
| CYP2C8*4                        | rs1058930  | C792G                   | Ile264Met        | C/C                                  | Normal activity            |
| OTHER DRUG METABOLIZING ENZYMES |            |                         |                  |                                      |                            |
| TPMT*2                          | rs1800462  | C>G                     | Ala80Pro         | C/C                                  | Normal activity            |
| TPMT*3B                         | rs1800460  | G460A                   | Ala154Thr        | G/G                                  | Normal activity            |
| TPMT*3C                         | rs1142345  | A719G                   | Tyr240Cys        | A/A                                  |                            |
| UGT1A1*28                       | rs8175347  | (TA)(n) repeat sequence | (6/7TA) TATA box | 6/6                                  | Normal activity            |
| UGT2B17                         |            | Deletion                |                  | Norma Genotype                       | Normal activity            |
| DPYD                            | rs2297595  | A166G                   |                  | A/A                                  | Normal activity            |
|                                 | rs67376798 | A2846T                  | Asp949Val        | A/A                                  |                            |
| DPYD*6                          | rs1801160  | G>A                     | Val732Ile        | G/G                                  | Normal activity            |
| DPYD*2A                         | rs3918290  | IVS 14+1G>A             |                  | G/G                                  | -                          |
| COMT                            | rs4680     | G>A                     | Val158Met        | G/A                                  | Decreased                  |
|                                 | rs4633     | C>T                     | His62His         | C/T                                  |                            |
|                                 |            |                         |                  | C/G                                  |                            |
| COMT                            | rs4818     | C>G                     | Leu136Leu        | G alleles lead to increased activity | Increased                  |
| MTHFR                           | rs1801133  | C677T                   | Ala222Val        | T/T                                  | Normal activity            |
| MTHFR                           | rs1801131  | A1298C                  | Glu429Ala        | A/A                                  | Decreased                  |
| TSER-                           | rs45445694 | 28bpVNTR                |                  | 3R/3R                                | Increased transcription    |
| CBR3                            | rs1056892  | G>A                     | Val244Met        | G/G                                  | Normal activity            |
| CYBA                            | rs4673     | C242T                   |                  | C/T                                  |                            |
| NCF4                            | rs1883112  | A212G                   |                  | G/G                                  |                            |
| RAC2                            | rs13058338 | T7508A                  |                  | T/A                                  |                            |
| NAT1*14B                        | rs4986782  | G560A                   | Arg187Gln        | G/G                                  | Normal activity            |
| NAT1*15B                        | rs5030839  | C599T                   | Stop Codon       | C/C                                  | Normal activity            |
| NAT1*17B                        | rs56379106 | C190T                   | Arg64Trp         | C/C                                  | Normal activity            |

|                             |                     |              |                        |                                                                                               |                               |
|-----------------------------|---------------------|--------------|------------------------|-----------------------------------------------------------------------------------------------|-------------------------------|
| NAT1*22B                    | rs56172717          | A752T        | Asp251Val              | A/A                                                                                           | Normal activity               |
| NAT2*3                      | rs1801280           | T341C        | Ile114Thr              | C/C<br>C allele lead to lower activity                                                        | Decreased                     |
| NAT2*6                      | rs1799930           | G590A        | Arg197Gln              | G/G                                                                                           | Normal activity               |
| NAT2*7                      | rs1799931           | G857A        | Gly286Glu              | G/G                                                                                           |                               |
| UMPS                        | rs1801019           | G213A<br>G>C | Gly213Asp<br>Gly213Ala | G/C                                                                                           | -                             |
| CBS                         | rs234706            | C699T        |                        | C/T<br>Allele T associated with increased risk of ammonia and sulphite detoxification defects |                               |
| MTR                         | rs1805087           | A2756G       |                        | A/G                                                                                           | Increased cardiovascular risk |
| MTRR                        | rs1801394           | A66G         |                        | A/G                                                                                           | Increased cardiovascular risk |
| RECEPTORS                   |                     |              |                        |                                                                                               |                               |
| DRD2/ANKK1-Q713K            | rs1800497           | C957T        |                        | C/C                                                                                           | Normal activity               |
| DRD2-141-insC/delC          | rs1799732           | insC/delC    | Upstream               | InsC/InsC                                                                                     | Normal activity               |
| DRD2-S311C                  | rs1801028           | C932G        | Ser311Cys              | C/C                                                                                           | Normal activity               |
| DRD3-S9G                    | rs6280              | A25G         | Gly9Ser                | A/A                                                                                           | Normal activity               |
| HTR2A                       | rs6314              | C1354T       | His452Tyr              | C/T                                                                                           |                               |
|                             | rs7997012           | A>G          | Intron                 | A/G                                                                                           |                               |
|                             | rs6311              | G1438A       | Upstream               | A/A                                                                                           |                               |
| HTR2C                       | rs6318              | G68C         | Cys23Ser               | G/G                                                                                           |                               |
| OPRM1                       | rs1799971           | A118G        | Asn40Asp               | A/G                                                                                           | More pain                     |
| VDR-BmsI                    | rs1544410           | C>T          |                        | C/C                                                                                           |                               |
| VDR-TaqI                    | rs731236            | A>G          |                        | A/A                                                                                           |                               |
| VDR-Apa                     | rs7975232           | C>A          |                        | C/A                                                                                           |                               |
| VDR                         | rs4516035           | 1012T>C      |                        | T/T                                                                                           |                               |
| AGT                         | rs4762              | C9369T       | T174M                  | C/T<br>T allele leads to high level of angiotensinogen and increased cardiovascular risk      | Increased cardiovascular risk |
| AGT                         | rs699               | T9543C       | M235T                  | C/C<br>C allele leads to increased cardiovascular risk and sodium related hypertension        | Increased cardiovascular risk |
| AGTR1                       | rs5186              | A1166C       |                        | A/C<br>C allele leads to hypertension                                                         | Increased cardiovascular risk |
| ITGB3                       | rs5918              | T1565C       |                        | T/T                                                                                           | Normal activity               |
| OXIDATION REDUCTION ENZYMES |                     |              |                        |                                                                                               |                               |
| GSTP1                       | rs1695<br>rs1138272 | A313G<br>C>T | Ile105Val<br>V114A     | A/G<br>C/C<br>G alleles lead to lower activity                                                | Decreased                     |
| GSTM1                       |                     | Deletion     |                        | Deleted                                                                                       | No activity                   |
| GSTT1                       |                     | Deletion     |                        | Normal                                                                                        | Normal activity               |
| DNA REPAIR ENZYMES          |                     |              |                        |                                                                                               |                               |
| ERCC1                       | rs3212986           | C8092A       | 3 Prime UTR            | C/A                                                                                           | -                             |

|                     |                        |            |               |                                               |                                       |
|---------------------|------------------------|------------|---------------|-----------------------------------------------|---------------------------------------|
|                     | rs11615                | T19007C    | Asn118=       | T/C                                           |                                       |
| XRCC1               | rs25487                | G28152A    | Gln399Arg     | G/A                                           |                                       |
| LIPID METABOLISM    |                        |            |               |                                               |                                       |
| APOA1               | rs1799837              | G75A       |               | G/G                                           |                                       |
|                     |                        |            |               | Protective against cardiovascular event       |                                       |
| APOB1               | rs5742904              | G10580A    | Arg3500Gln    | G/G                                           |                                       |
| APOE                | rs7412<br>rs429358     |            |               | E3/E3                                         | Normal activity                       |
| CETP                | rs1532624              | C>A        | Intron        | C/C                                           | Normal activity                       |
| HMGCR               | rs3761740              | C911A      | Upstream tra. | C/C                                           | Normal activity                       |
|                     | rs5908                 | A>G        | Ile585Val     | A/A                                           | Normal activity                       |
| PON1                | rs662                  | A575G      | Gln192Arg     | A/A                                           | Normal activity                       |
|                     | rs705379               | C108T      | Upstream      | C/C                                           |                                       |
| COAGULATION ENZYMES |                        |            |               |                                               |                                       |
| VKORC               | rs9923231              | G1639A     | Upstream      | G/A<br>C/T                                    |                                       |
|                     | rs9934438              | C1173T     | Intron        | A/T alleles lead to less coagulating capacity | Decreased                             |
|                     |                        |            |               |                                               |                                       |
| CES1                | rs2244613<br>rs8192935 | A>C<br>C>T | Intron        | A/A<br>C/C                                    | Normal activity                       |
| F II                | rs1799963              | G20210A    | 3 Prime UTR   | G/G                                           | Normal activity                       |
| PAI                 | rs1799889              | 4G/5G      | Upstream      | 4G/4                                          |                                       |
| F V                 | rs6025                 | G1691A     | Arg506Gln     | G/G                                           |                                       |
| β-fibrinogen        | rs1800790              | G455A      | -             | G/A<br>A allele                               | Increased level of fibrin-<br>ogenous |
| FattoreXIII         | rs5985                 | G>T        | Val135Leu     | G/T                                           |                                       |

**Abbreviation:** ABCB1, ATP binding cassette subfamily B member 1; ABCC1, ATP Binding Cassette Subfamily C Member 1; MRP1, Multidrug resistance-associated protein 1; ABCC2, ATP Binding Cassette Subfamily C Member 2; MRP2, Multidrug resistance-associated protein 2; ABCG2, ATP-binding cassette sub-family G membro 2; SLC15A2, Solute Carrier Family 15 Member 2; SLC01B1, solute carrier organic anion transporter family member 1B1; 5-HTTLPR, serotonin-transporter-linked polymorphic region; CYP1A2, Cytochrome P450 Family 1 Subfamily A Member 2; CYP2C19, cytochrome P450 family 2 subfamily C member 19; CYP2D6 Cytochrome P450 family 2 subfamily D member 6; CYP3A4, Cytochrome P450 family 3 subfamily A member 4; CYP3A5, Cytochrome P450 family 3 subfamily A member 5; CYP1A1 Cytochrome P450 family 1 subfamily A member 1; CYP2B6 Cytochrome P450 family 2 subfamily B member 6; CYP2C8, Cytochrome P450 family 2 subfamily C member 8; TPMT, Thiopurine methyltransferase; UGT1A1, uridine-diphosphoglucuronate glucuronosyltransferase; DPYD, dihydropyrimidinase; COMT, catechol O-methyltransferase; MTR, methionine synthase; TSER, synthase enhancer region; CBR3, carbonyl reductase 3; MTHFR, methylenetetrahydrofolate reductase; TYMS, thymidylate synthase; NAT1, Arylamine N-acetyltransferase 1; NAT2, Arylamine N-acetyltransferase 2; UMPS, Uridine Monophosphate Synthetase; DRD2, dopamine receptor D2; ANKK1, Ankyrin repeat and kinase domain containing 1; HTR2A, 5-Hydroxytryptamine Receptor 2A; HTR2C, 5-Hydroxytryptamine Receptor 2C; OPRM1, Opioid Receptor Mu 1; VDR, vitamin D receptor; AGT, angiotensinogen gene; ITGB3, integrin subunit beta 3; GSTP1, Glutathione S-Transferase P1; GSTM1, glutathione S-transferase Mu 1; GSTT1, Glutathione S-Transferase Theta 1; ERCC1, Excision Repair 1, Endonuclease Non-Catalytic Subunit; XRCC1, X-ray repair cross complementing protein 1; APOA1, Apolipoprotein A1; APOB1, Apolipoprotein B1; CETP, Cholesteryl ester transfer protein; HMGCR, 3-Hydroxy-3-Methylglutaryl-CoA Reductase; PON1, paraoxonase/arylesterase 1; VKORC, Vitamin K epoxide Reductase Complex; CES1 Carboxylic ester hydrolase; F II, coagulation factor II; PAI, Plasminogen Activator Inhibitor; F V, coagulation factor V; CBS, cystathionine beta-synthase; F XIII, coagulation factor XIII;

Colour legend

 Increased activity

 Decreased activity

 Absent activity
